# Supplementary material for: Simple procedure for mono- and bis-end-functionalization of regioregular poly(3-hexylthiophene)s using chalcogens
Source: Royal Society of Chemistry journal article supplement (doi:10.1039/c3cc47560c), 2013-10-31
Supplement: c3cc47560c.pdf [file c3cc47560c.pdf]

# Simple Procedure for Mono- and Bis-end-functionalization of Regioregular Poly(3-hexylthiophene)s using Chalcogens

Ken Okamoto,<sup>a,b</sup> and Christine K. Luscombe<sup>\*a,b</sup>

<sup>a</sup>Department of Materials Science and Engineering, University of Washington, Seattle, Washington 98195-2120, United States. Fax: + 1-206-543-3100; Tel: + 1-206-616-1220;

<sup>b</sup>Molecular Engineering and Sciences Institute, University of Washington, Seattle, WA, 98195-1652, United States.

E-mail: luscombe@u.washington.edu

| Contents                                                                                                                                              | Page   |
|-------------------------------------------------------------------------------------------------------------------------------------------------------|--------|
| 1. Instrumentation and Materials                                                                                                                      | S2     |
| 2. General Procedure for Polymer Synthesis                                                                                                            | S3-5   |
| 3. <sup>1</sup> H NMR spectra of $\alpha$ Br/ $\omega$ H P3HT, $\alpha$ Br/ $\omega$ SH P3HT, and $\alpha$ SH/ $\omega$ SH P3HT                       | S6-7   |
| 4. MALDI-TOF mass spectra of $\alpha$ S-TIPS / $\omega$ S-TIPS P3HT and $\alpha$ SH/ $\omega$ SH P3HT                                                 | S8-9   |
| 5. <sup>1</sup> H NMR spectra of $\alpha$ 2-tol/ $\omega$ H P3HT and $\alpha$ 2-tol/ $\omega$ SH P3HT                                                 | S10    |
| 6. MALDI-TOF mass spectra of $\alpha$ 2-tol/ $\omega$ H P3HT and $\alpha$ 2-tol/ $\omega$ SH P3HT                                                     | S11-12 |
| 7. <sup>1</sup> H NMR spectrum $\alpha$ 2-tol/ $\omega$ SeH P3HT                                                                                      | S13    |
| 8. MALDI-TOF mass spectrum of $\alpha$ 2-tol/ $\omega$ SeH P3HT                                                                                       | S14    |
| 9. <sup>1</sup> H NMR spectra of $\alpha$ Br/ $\omega$ CS <sub>2</sub> Ni(dppp)Br P3HT and $\alpha$ 2-tol/ $\omega$ CS <sub>2</sub> Ni(dppp)Br P3HT   | S15-16 |
| 10. <sup>31</sup> P NMR spectra of $\alpha$ Br/ $\omega$ CS <sub>2</sub> Ni(dppp)Br P3HT and $\alpha$ 2-tol/ $\omega$ CS <sub>2</sub> Ni(dppp)Br P3HT | S17    |
| 11. MALDI-TOF mass spectra of $\alpha$ Br/ $\omega$ CS <sub>2</sub> Ni(dppp)Br P3HT and $\alpha$ 2-tol/ $\omega$ CS <sub>2</sub> Ni(dppp)Br P3HT      | S18-19 |
| 12. Proposed SH end-capping mechanisms (Scheme S1 and S2)                                                                                             | S20    |
| 13. Reference                                                                                                                                         | S21    |

## 1. Instrumentation and Materials

$^1\text{H}$  NMR spectra were obtained on Bruker AV-300 and AV-400 spectrometers using  $\text{CDCl}_3$  as solvent (peak position  $\delta^1\text{H} = 7.26$  ppm) and tetramethylsilane was used as an internal standard for  $^1\text{H}$  NMR spectra (0.00 ppm) and  $^{31}\text{P}\{^1\text{H}\}$  spectra were referenced to external  $\text{H}_3\text{PO}_4$  (0.00 ppm). Number average molecular weight ( $M_n$ ) were determined using end group analysis by  $^1\text{H}$  NMR,<sup>1</sup> and size exclusion chromatography (Viscotek model 305 triple detector array at 30 °C (RI, viscometer, light scattering), columns: Viscotek I-MBHMW-3078 ( $\times 2$ ), mobile phase: THF, flow rate: 1 mL/min, injection volume: 100  $\mu\text{L}$ , the molecular weights of polymers and the polydispersities (PDI) were determined by GPC relative to polystyrene standards). MALDI-TOF mass spectra were recorded on a Bruker Autoflex II spectrometer using terthiophene as the sample matrix. Samples were prepared by dissolving ca. 0.5 mg in 100  $\mu\text{L}$  of matrix solution in dichloromethane and approximately 1.5  $\mu\text{L}$  of this solution was deposited on the plate. The MALDI experiments were performed in both the linear positive mode and reflectron positive mode.

All reactions were carried out under a nitrogen atmosphere using standard Schlenk techniques. 2-bromo-3-hexylthiophene, (diacetoxyiodo)benzene, iodine, 2.0 M *i*-PrMgCl THF solution,  $\text{Ni}(\text{dppp})\text{Cl}_2$ , sulphur powder, DBU, triisopropylsilanethiol (TIPS-SH), selenium powder, anhydrous carbon disulfide ( $\text{CS}_2$ ), 2,2':5',2''-terthiophene (for a MALDI-TOF mass matrix), all solvents (anhydrous THF,  $\text{CHCl}_3$ , hexenes, acetone, methanol), aqueous HCl were purchased from Aldrich, Alfa Aesar or Fisher Scientific and used without further purification. The monomer 2-bromo-5-iodo-3-hexylthiophene and the catalyst 2-tolylNi( $\text{PPh}_3$ ) $_2$ Br were synthesized according to literature procedures.<sup>2</sup>

## 2. General Procedure for Polymer Synthesis

The general procedure (Table 1, entry 1) for the synthesis of selectively end-capped P3HT is as follows. A Schlenk tube was charged with 2-bromo-5-iodo-3-hexylthiophene (1.0 mmol, 0.373 g), well-dried LiCl (2.0 mmol, 0.086 g), and THF (9.5 mL). 2.0 M *i*-PrMgCl THF solution (0.5 mL, 1.0 mmol) was added *via* syringe at 0 °C for 10 min, then the reaction mixture was allowed to stir at room temperature for 1 h. Ni(dppp)Cl<sub>2</sub> (43.4 mg, 8 mol%) was added in one portion at room temperature. After the reaction mixture had been stirred at room temperature for 1 h, it was equally divided into two portions (5 mL × 2).

### *Proton termination for αBr/ωH P3HT*

One of the portions was quenched with 5 M HCl and the residue was added to 50 mL MeOH. The precipitate was washed with MeOH and acetone. The washed polymer was dried *in vacuo* to afford rr-P3HT (75% yield).

<sup>1</sup>H NMR (300 MHz, CDCl<sub>3</sub>): δ 6.98 (s, 1 H), 2.80 (t, *J* = 7.7 Hz), 2.61 (α CH<sub>2</sub> peak of ω-end 3-hexylthiophene-5-yl), 2.57 (α CH<sub>2</sub> peak of α-end 2-bromo-3-hexylthiophene-5-yl, the total number of proton between δ 2.83-2.57 is 2 H) 1.71 (quint, *J* = 7.6 Hz, 2 H), 1.48-1.38 (m, 2 H), 1.37-1.30 (m, 4 H), 0.92 (t, *J* = 7.2 Hz, 3 H). <sup>1</sup>H NMR, DP = 10.0 (number average molecular weight: *M*<sub>n</sub> = 1.6k), <sup>1</sup> MALDI-TOF MS peak top: DP = 12.6 (2.1k).

### *Thiol termination for αBr/ωSH P3HT*

The other portion was poured into the mixture of sulphur power (S<sub>8</sub>, 1.25 mmol, 40 mg) and 1,8-diazabicyclo[5.4.0]undec-7-ene (DBU, 0.16 mmol (ca. 1/8 eq of S<sub>8</sub>), 23.4 μL). The reaction mixture was stirred for 30 min, and 5 M HCl (10 mL) was added. Following the above purification procedure for 5 M HCl quenched P3HT, polymer powder was obtained (77% yield).

<sup>1</sup>H NMR (300 MHz, CDCl<sub>3</sub>): δ 6.98 (s, 1 H), 2.80 (t, *J* = 7.7 Hz), 2.54 (α CH<sub>2</sub> peak of α-end 2-bromo-3-hexylthiophene-5-yl, the total number of proton between δ 2.83-2.51 is 2 H) 1.71 (quint, *J* = 7.6 Hz, 2 H), 1.48-1.23 (m, 6 H), 0.91 (t, *J* = 7.2 Hz, 3 H). <sup>1</sup>H NMR: DP = 10.0 (*M*<sub>n</sub> = 1.6k), MALDI-TOF MS peak top: DP = 12.0 (2.1k).

### *Dithiol termination for αSH/ωSH P3HT*

After standard P3HT synthesis, the reaction was quenched with a premixed solution of TIPS-SH/*i*-PrMgCl 1:1 (TIPS-SH, 1.0 mmol, 0.215 mL and 2 M *i*-PrMgCl THF solution, 0.5 mL). The reaction mixture was refluxed for 30 min with stirring. Following the above purification procedure for 5 M HCl quenched P3HT, polymer powder was obtained. The

isolated  $\alpha$ S-TIPS / $\omega$ S-TIPS P3HT was treated with 0.3 M TBAF  $\text{CHCl}_3$  solution (50 mL) and after 10 min, the residue was washed with 0.1 M HCl (70 mL  $\times$  2). After the solvent was removed under reduced pressure, unprotected  $\alpha$ SH/ $\omega$ SH P3HT was obtained (70%, yield).

$^1\text{H}$  NMR (300 MHz,  $\text{CDCl}_3$ ):  $\delta$  6.98 (s, 1 H), 2.80 (t,  $J$  = 7.7 Hz, 2 H), 1.71 (quint,  $J$  = 7.6 Hz, 2 H), 1.48-1.30 (m, 6 H), 0.91 (t,  $J$  = 7.2 Hz, 3 H). NMR: DP = unknown, due to no clear signals of end group on NMR spectra (Fig. S3), MALDI-TOF MS peak top: DP = 11.0 (1.9k).

#### *CS<sub>2</sub> termination for $\alpha$ Br/ $\omega$ CS<sub>2</sub>Ni(dppp) P3HT*

To the 1.0 mmol scale polymerization reaction mixture, carbon disulfide ( $\text{CS}_2$ , 1.0 mmol, 61  $\mu\text{L}$ ) was added. After the  $\text{CS}_2$ -quenched reaction mixture was stirred for 30 min, 5 M HCl (10 mL) was added to the reaction mixture. Following the above purification procedure for 5 M HCl quenched P3HT, polymer powder was obtained.

$^1\text{H}$  NMR (300 MHz,  $\text{CDCl}_3$ ):  $\delta$  6.98 (s, 1 H), 2.80 (t,  $J$  = 7.7 Hz), 2.57 ( $\alpha$   $\text{CH}_2$  peak of  $\alpha$ -end 2-bromo-3-hexylthiophene-5-yl, the total number of proton between  $\delta$  2.80-2.57 is 2 H), 1.71 (quint,  $J$  = 7.6 Hz, 2 H), 1.48-1.38 (m, 2 H), 1.37-1.30 (m, 4 H), 0.91 (t,  $J$  = 7.2 Hz, 3 H), 7.75 (m, dppp), 7.30 (m, dppp), 1.19 (m, dppp), 0.85 (m, dppp).  $^{31}\text{P}$  NMR (202 MHz,  $\text{CDCl}_3$ ):  $\delta$  9.4 ppm.  $^1\text{H}$  NMR, DP = 16.0 ( $M_n$  = 2.6k), MALDI-TOF MS peak top: DP = 5.0 (1.6k).

Externally initiated rr-P3HTs was prepared according to published procedures<sup>1</sup> and the above Grignard monomer preparation using 8 mol% of 2-tolylNi( $\text{PPh}_3$ )<sub>2</sub>Br. The polymerization reaction mixtures were quenched using the above quenching methods unless otherwise noted.

#### *$\alpha$ 2-tol/ $\omega$ H P3HT*

$^1\text{H}$  NMR (300 MHz,  $\text{CDCl}_3$ ):  $\delta$  7.43 (m, 2 H), 7.24 (m, 2 H), 6.98 (s, 1 H), 2.80 (t,  $J$  = 7.7 Hz), 2.61 ( $\alpha$   $\text{CH}_2$  peak of  $\omega$ -end 3-hexylthiophene-5-yl, the total number of proton between  $\delta$  2.80-2.61 is 2 H), 2.49 ( $\text{CH}_3$  peak of  $\alpha$ -end tolyl) 1.71 (quint,  $J$  = 7.6 Hz, 2 H), 1.48-1.38 (m, 2 H), 1.37-1.30 (m, 4 H), 0.91 (t,  $J$  = 7.2 Hz, 3 H).  $^1\text{H}$  NMR, DP = 14.0 ( $M_n$  = 2.4k),<sup>2</sup> MALDI-TOF MS peak top: DP = 16.0 (2.7k).

#### *$\alpha$ 2-tol/ $\omega$ SH P3HT*

$^1\text{H}$  NMR (300 MHz,  $\text{CDCl}_3$ ):  $\delta$  7.43 (m, 2 H), 7.24 (m, 2 H), 6.98 (s, 1 H), 2.80 (t,  $J$  = 7.7 Hz, 2 H), 2.49 ( $\text{CH}_3$  peak of  $\alpha$ -end tolyl) 1.71 (quint,  $J$  = 7.6 Hz, 2 H), 1.48-1.38 (m, 2 H), 1.37-1.30 (m, 4 H), 0.91 (t,  $J$  = 7.2 Hz, 3 H).  $^1\text{H}$  NMR, DP = 14.0 ( $M_n$  = 2.4k),<sup>2</sup> MALDI-TOF MS peak top: DP = 16.0 (2.6k).

*Selenol termination for  $\alpha$ 2-tol/ $\omega$ SeH P3HT*

The 1.0 mmol scale polymerization reaction mixture was poured into the mixture of well-mixed selenium power (Se, 1.25 mmol, 98.7 mg) and 1,8-diazabicyclo[5.4.0]undec-7-ene (DBU, 0.16 mmol (ca. 1/8 eq of Se), 23.4  $\mu$ L). After the selenium quenched reaction mixture was stirred overnight, 5 M HCl (10 mL) was added to the reaction mixture. Following the above purification procedure for 5 M HCl quenched P3HT, polymer powder was obtained.

$^1\text{H}$  NMR (300 MHz,  $\text{CDCl}_3$ ):  $\delta$  7.43 (m, 2 H), 7.24 (m, 2 H), 6.98 (s, 1 H), 2.80 (t,  $J = 7.7$  Hz, 2 H), 2.49 ( $\text{CH}_3$  peak of  $\alpha$ -end tolyl), 1.71 (quint,  $J = 7.6$  Hz, 2 H), 1.48-1.38 (m, 2 H), 1.37-1.30 (m, 4 H), 0.91 (t,  $J = 7.2$  Hz, 3 H).  $^1\text{H}$  NMR: DP = 10.0 ( $M_n = 1.8\text{k}$ ), MALDI-TOF MS peak top: DP = 13.0 (2.3k).

*$\alpha$ 2-tol/ $\omega$ CS<sub>2</sub>Ni(dppp)Br P3HT*

$^1\text{H}$  NMR (300 MHz,  $\text{CDCl}_3$ ):  $\delta$  7.43 (m, 2 H), 7.24 (m, 2 H), 6.98 (s, 1 H), 2.80 (t,  $J = 7.7$  Hz, 2 H), 2.49 ( $\text{CH}_3$  peak of  $\alpha$ -end tolyl), 1.71 (quint,  $J = 7.6$  Hz, 2 H), 1.48-1.38 (m, 2 H), 1.37-1.30 (m, 4 H), 0.91 (t,  $J = 7.2$  Hz, 3 H), 7.73 (m, dppp), 7.30 (m, dppp), 1.19 (m, dppp), 0.85 (m, dppp).  $^{31}\text{P}$  NMR (202 MHz,  $\text{CDCl}_3$ ):  $\delta$  9.4 ppm.  $^1\text{H}$  NMR: DP = 8.2 ( $M_n = 1.4\text{k}$ ), MALDI-TOF MS peak top: DP = 10.0 (2.3k).

3.  $^1\text{H}$  NMR spectra of  $\alpha\text{Br}/\omega\text{H}$  P3HT,  $\alpha\text{Br}/\omega\text{SH}$  P3HT, and  $\alpha\text{SH}/\omega\text{SH}$  P3HT

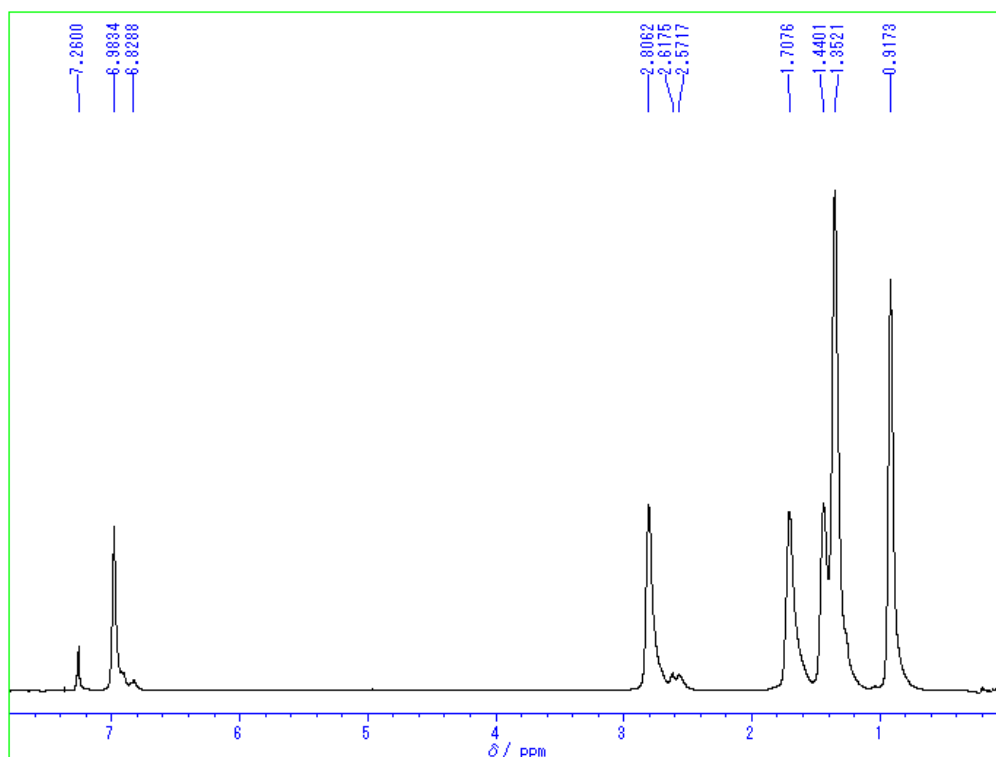

**Fig. S1**  $^1\text{H}$  NMR spectrum (300 MHz,  $\text{CDCl}_3$ , room temperature) of  $\alpha\text{Br}/\omega\text{H}$  P3HT.

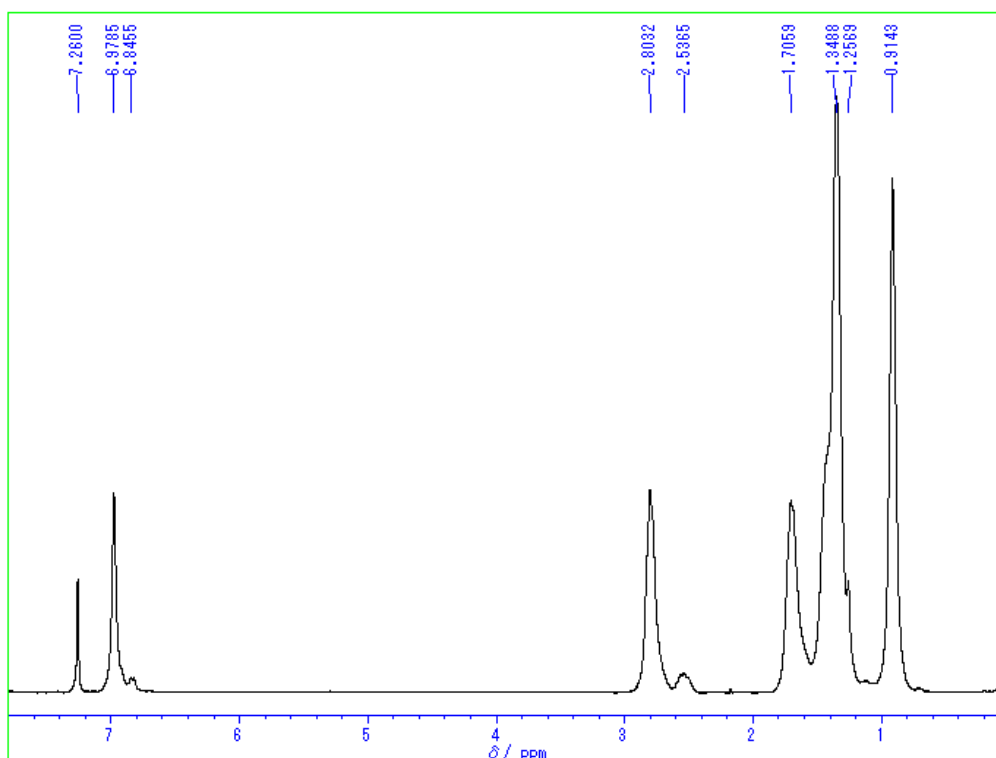

**Fig. S2**  $^1\text{H}$  NMR spectrum (300 MHz,  $\text{CDCl}_3$ , room temperature) of  $\alpha\text{Br}/\omega\text{SH}$  P3HT.

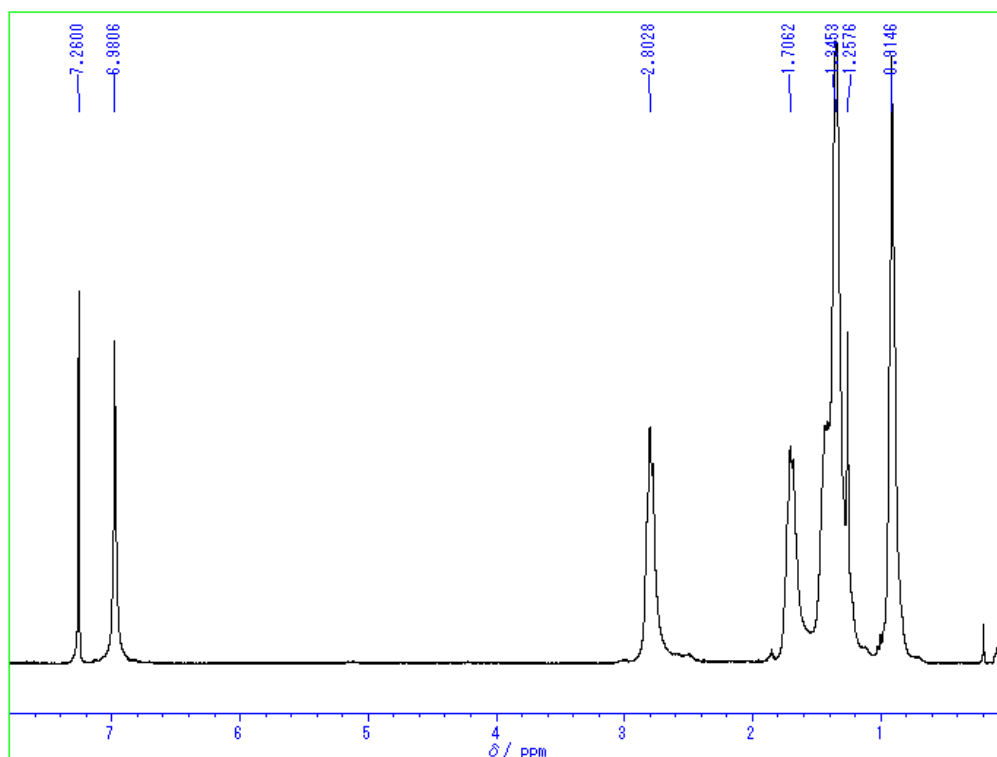

**Fig. S3**  $^1\text{H}$  NMR spectrum (300 MHz,  $\text{CDCl}_3$ , room temperature) of  $\alpha\text{SH}/\omega\text{SH}$  P3HT.

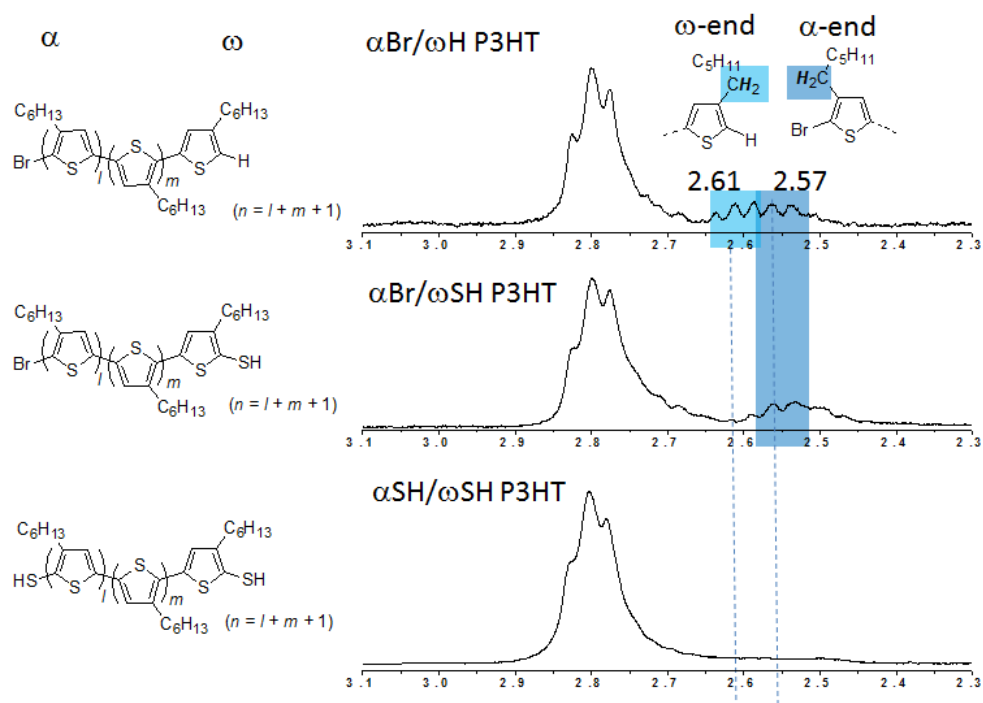

**Fig. S4** Expanded  $\alpha\text{-CH}_2$  region for Fig. S1-3.

#### 4. MALDI-TOF mass spectra of $\alpha$ TIPSSH/ $\omega$ TIPSSH P3HT and $\alpha$ SH/ $\omega$ SH P3HT

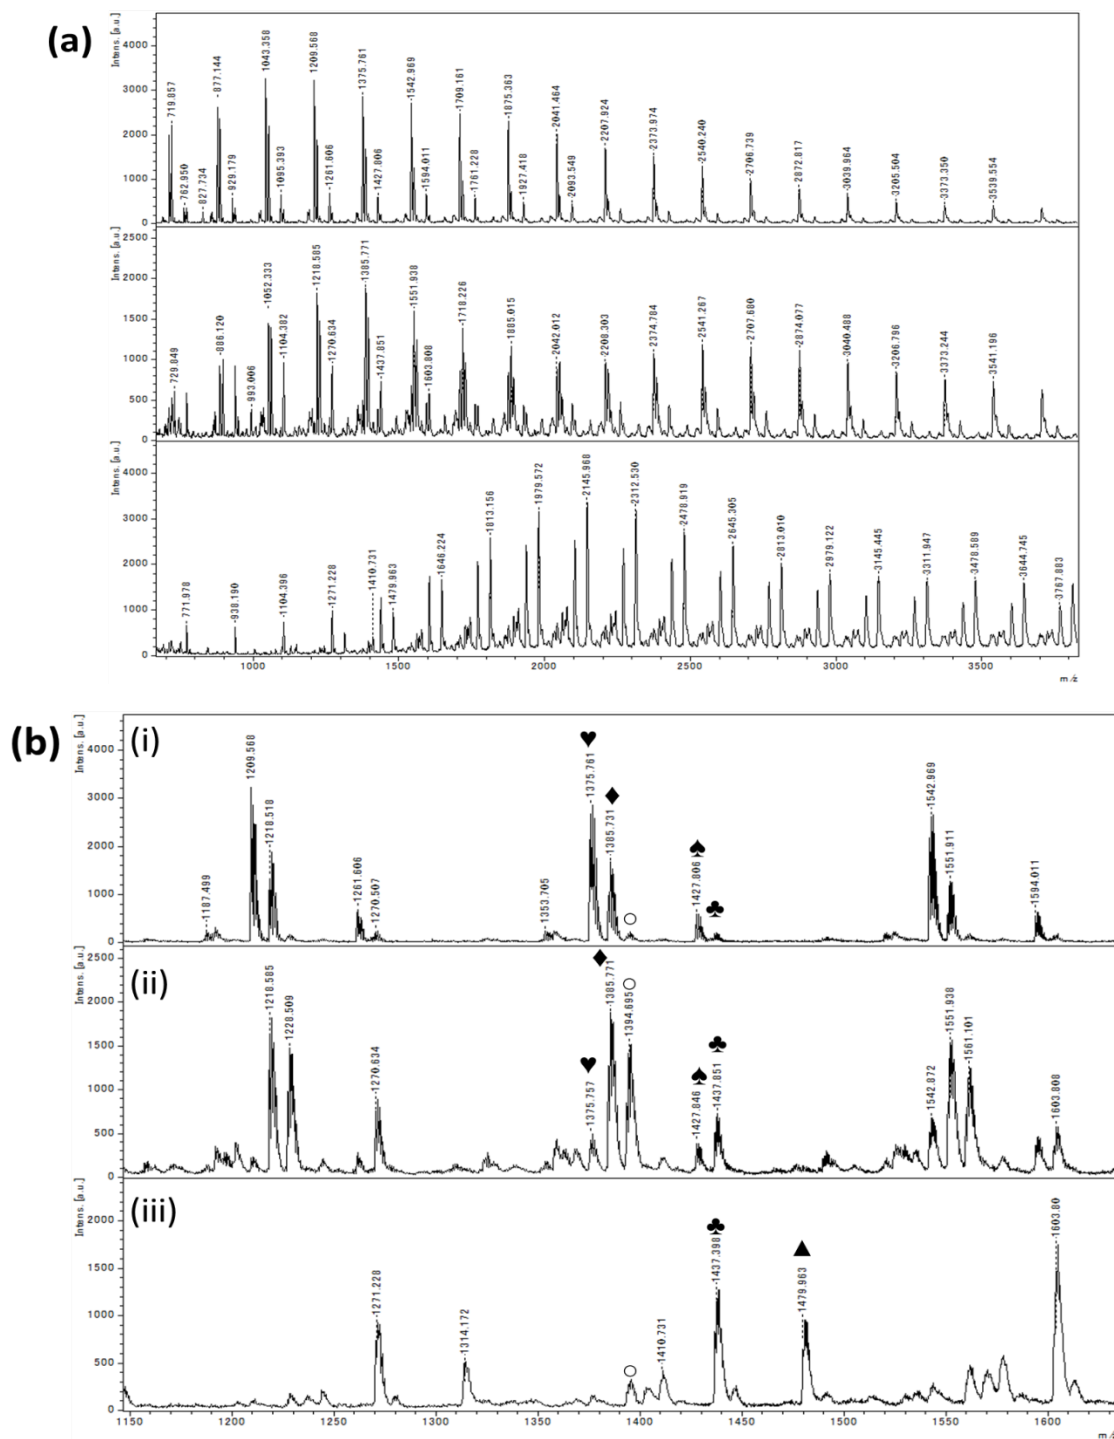

**Fig. S5** (a) MALDI-TOF mass spectra of  $\alpha$ S-TIPS/ $\omega$ S-TIPS P3HT prepared using post-treatment (i) 5 M HCl, (ii) MeOH, and (iii) 0.3 M TBAF in MeOH, (b) zoomed MALDI-TOF mass spectrum of peak top region, notations of 6 sets of peak series, ♥:  $\alpha$ S-TIPS / $\omega$ S-TIPS P3HT, ♦:  $\alpha$ ,  $\omega$ , S-TIPS, SH P3HT, ○:  $\alpha$ SH/ $\omega$ SH P3HT, ♠:  $\alpha$ ,  $\omega$ , S-TIPS, *i*-Pr-S P3HT, ♣  $\alpha$ ,  $\omega$  SH, *i*-Pr-S P3HT ▲ $\alpha$  *i*-Pr-S/ $\omega$  *i*-Pr-S P3HT.

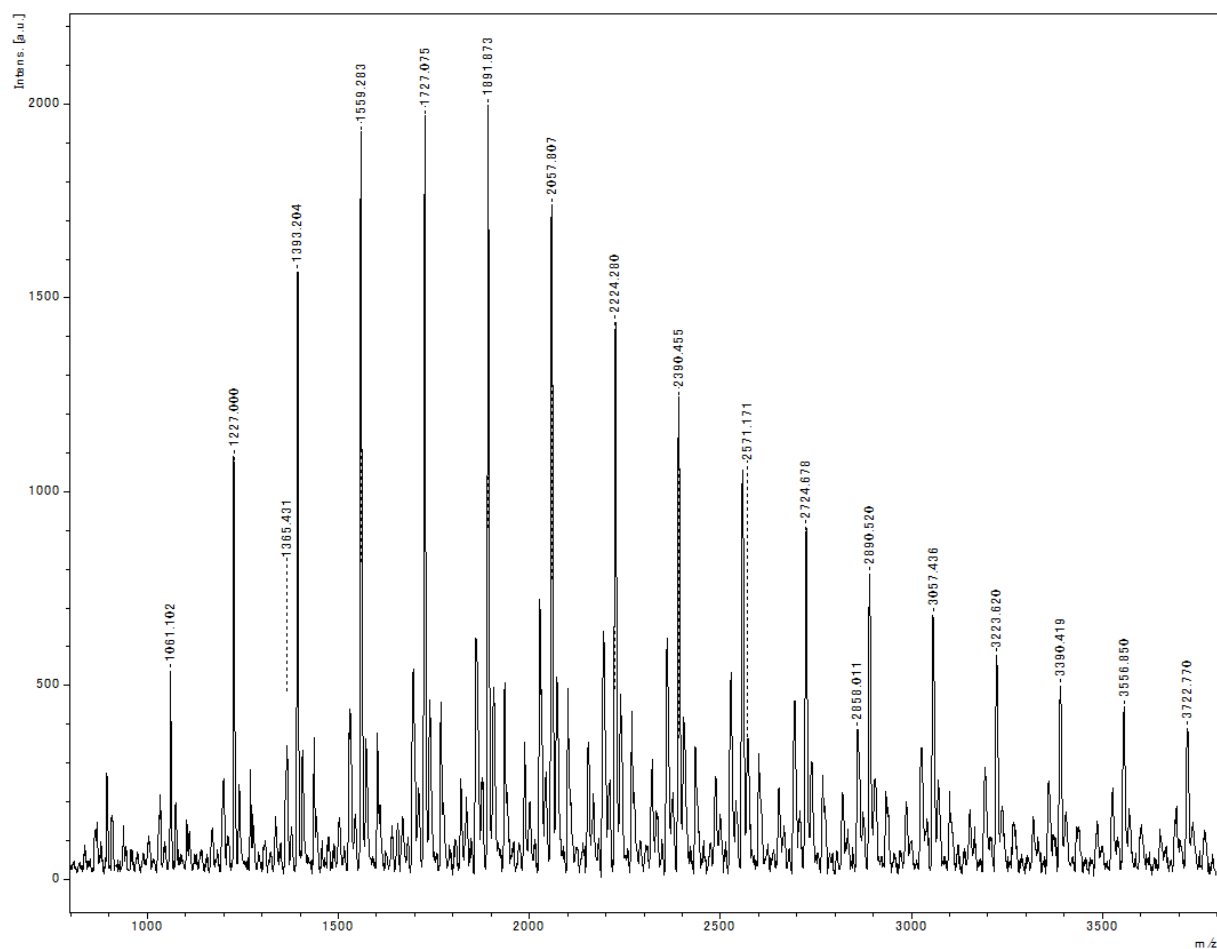

**Fig. S6** MALDI-TOF mass spectrum of  $\alpha$ SH/ $\omega$ SH P3HT.

Calculated mass:

$\alpha$ -end (2-thiol-3-hexylthiophene-5-yl) + poly(3-thiophene-2,5-diyl) +  $\omega$ -end

(2-thiol-3-hexylthiophene-5-yl) =  $199.36 + 166.28 (n - 1) + 199.36 = 66.15$  (thiol-thiol) +  $166.28 n$  (for example, 1729.0, 1895.2, 2061.5).

5.  $^1\text{H}$  NMR spectra of  $\alpha$ 2-tol/ $\omega$ H P3HT and  $\alpha$ 2-tol/ $\omega$ SH P3HT

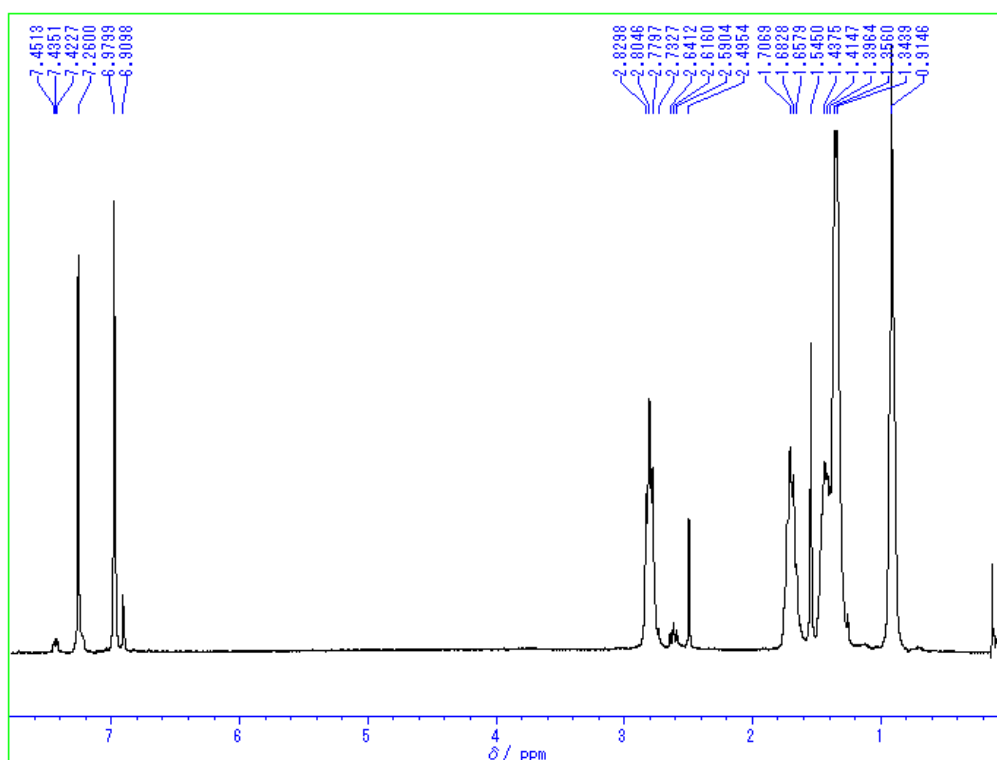

**Fig. S7**  $^1\text{H}$  NMR spectrum (300 MHz,  $\text{CDCl}_3$ , room temperature) of  $\alpha$ 2-tol/ $\omega$ H P3HT.

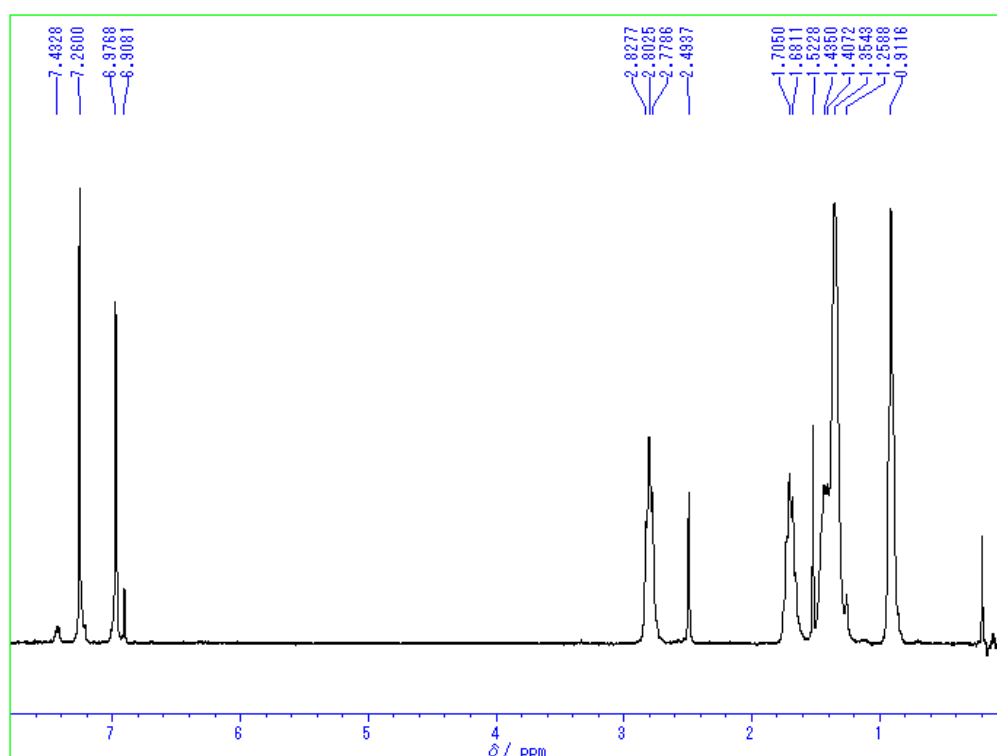

**Fig. S8**  $^1\text{H}$  NMR spectrum (300 MHz,  $\text{CDCl}_3$ , room temperature) of  $\alpha$ 2-tol/ $\omega$ SH P3HT.

## 6. MALDI-TOF mass spectra of $\alpha$ 2-tol/ $\omega$ H P3HT and $\alpha$ 2-tol/ $\omega$ SH P3HT

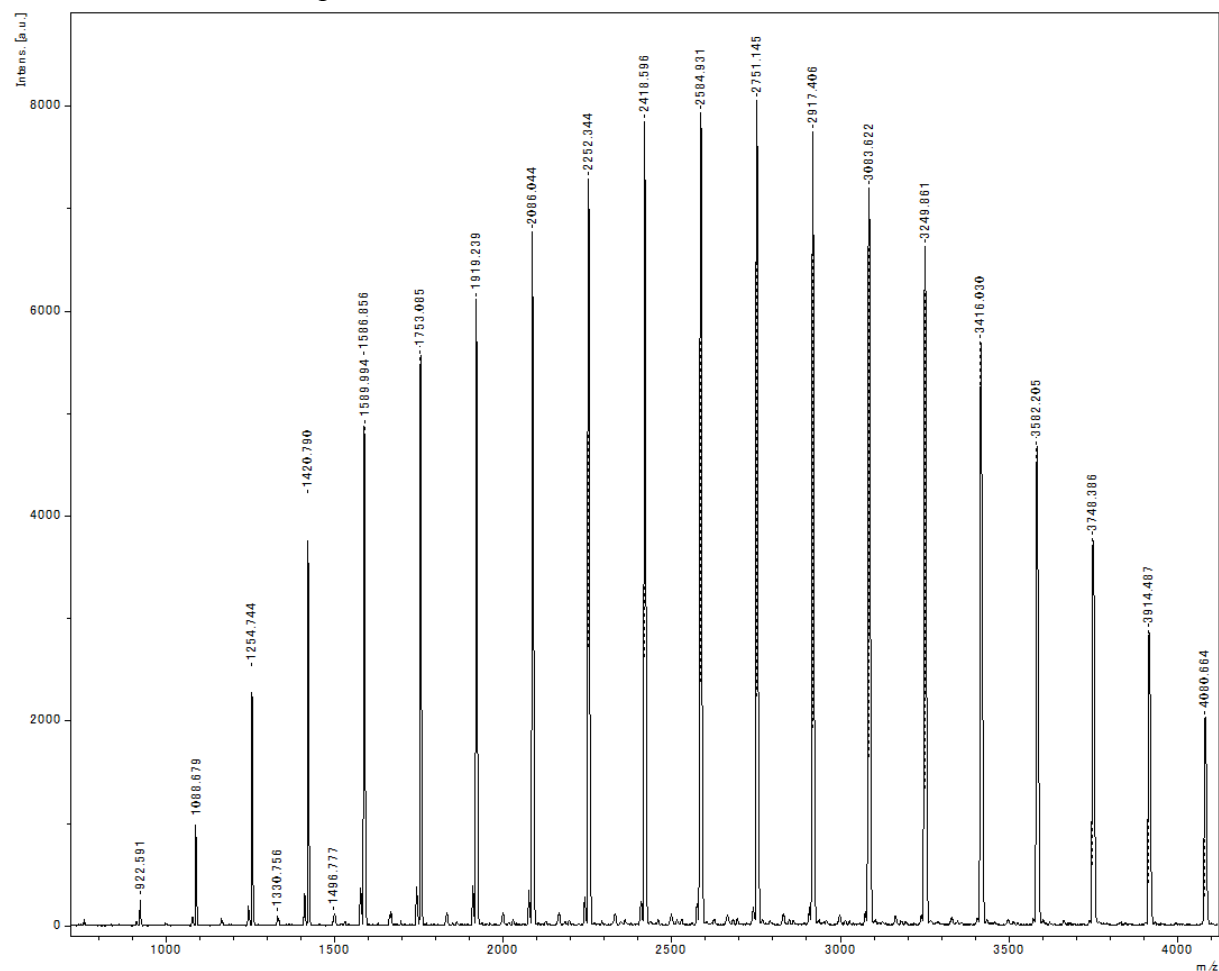

**Fig. S9** MALDI-TOF mass spectrum of  $\alpha$ 2-tol/ $\omega$ H P3HT.

Calculated mass:

$\alpha$ -end (2-tolyl) + poly(3-thiophene-2,5-diyl) +  $\omega$ -end (3-hexylthiophene-5-yl) = 91.13 + 166.28 ( $n - 1$ ) + 167.29 = 92.14 (tolyl-H) + 166.28  $n$   
(for example, 2420.1, 2586.3, 2752.6).

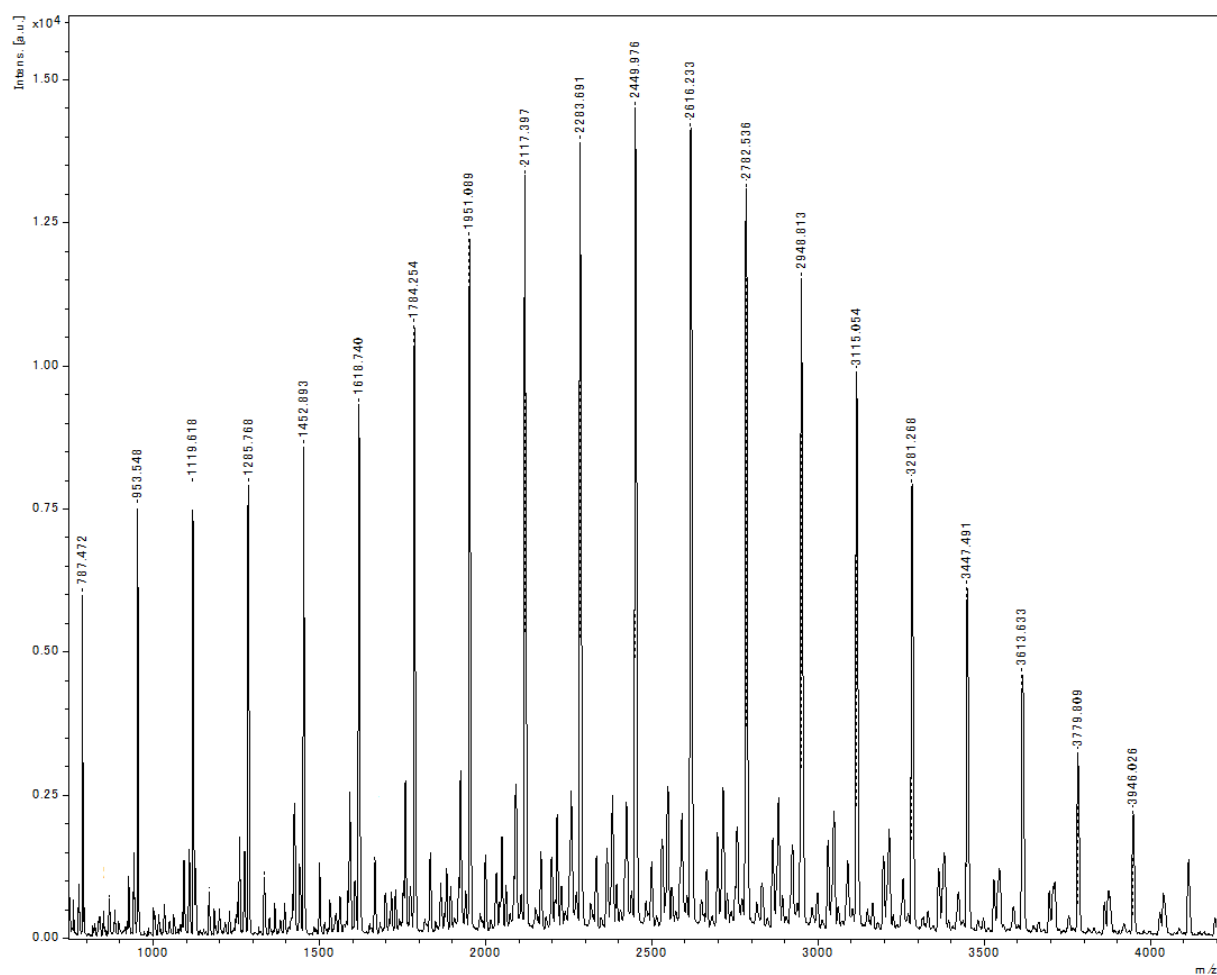

**Fig. S10** MALDI-TOF mass spectrum of  $\alpha$ 2-tol / $\omega$ SH P3HT.

Calculated mass:

$\alpha$ -end (2-tolyl) + poly(3-thiophene-2,5-diyl) +  $\omega$ -end (2-thiol-3-hexylthiophene-5-yl)

$= 91.13 + 166.28 (n - 1) + 199.36 = 124.21 \text{ (tolyl-SH)} + 166.28 n$

(for example, calculated Mass: (2119.6, 2285.9, 2452.1).

7.  $^1\text{H}$  NMR spectrum of  $\alpha 2\text{-tol}/\omega\text{SeH}$  P3HT

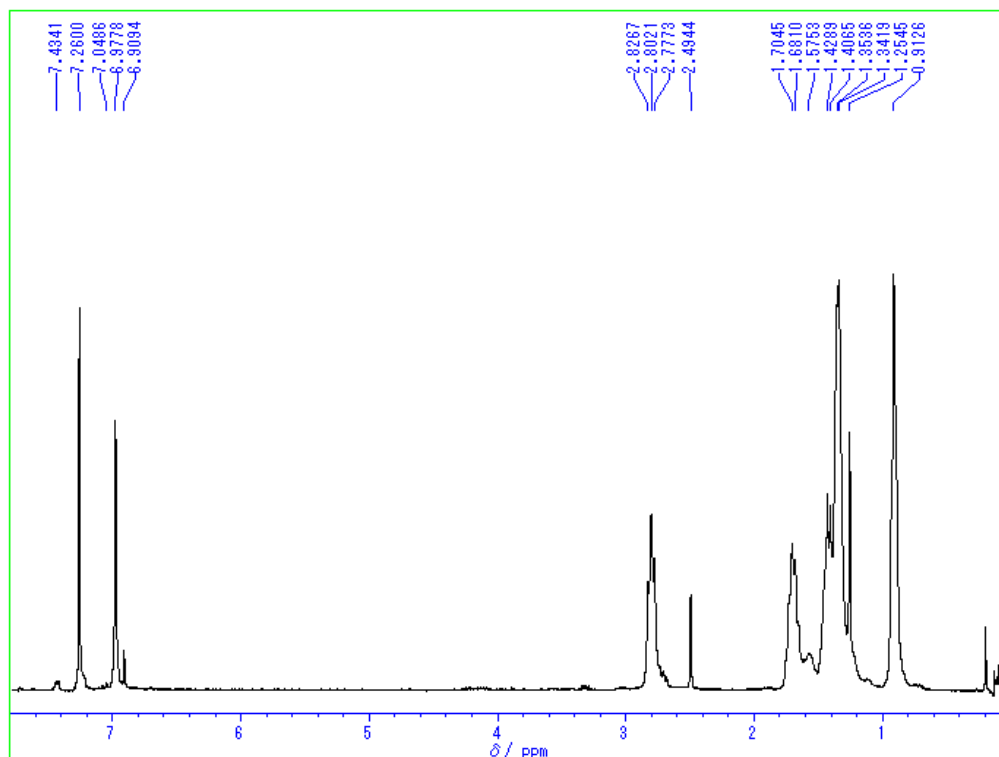

**Fig. S11**  $^1\text{H}$  NMR spectrum (300 MHz,  $\text{CDCl}_3$ , room temperature) of  $\alpha 2\text{-tol}/\omega\text{SeH}$  P3HT.

## 8. MALDI-TOF mass spectrum of $\alpha$ 2-tol/ $\omega$ SeH P3HT

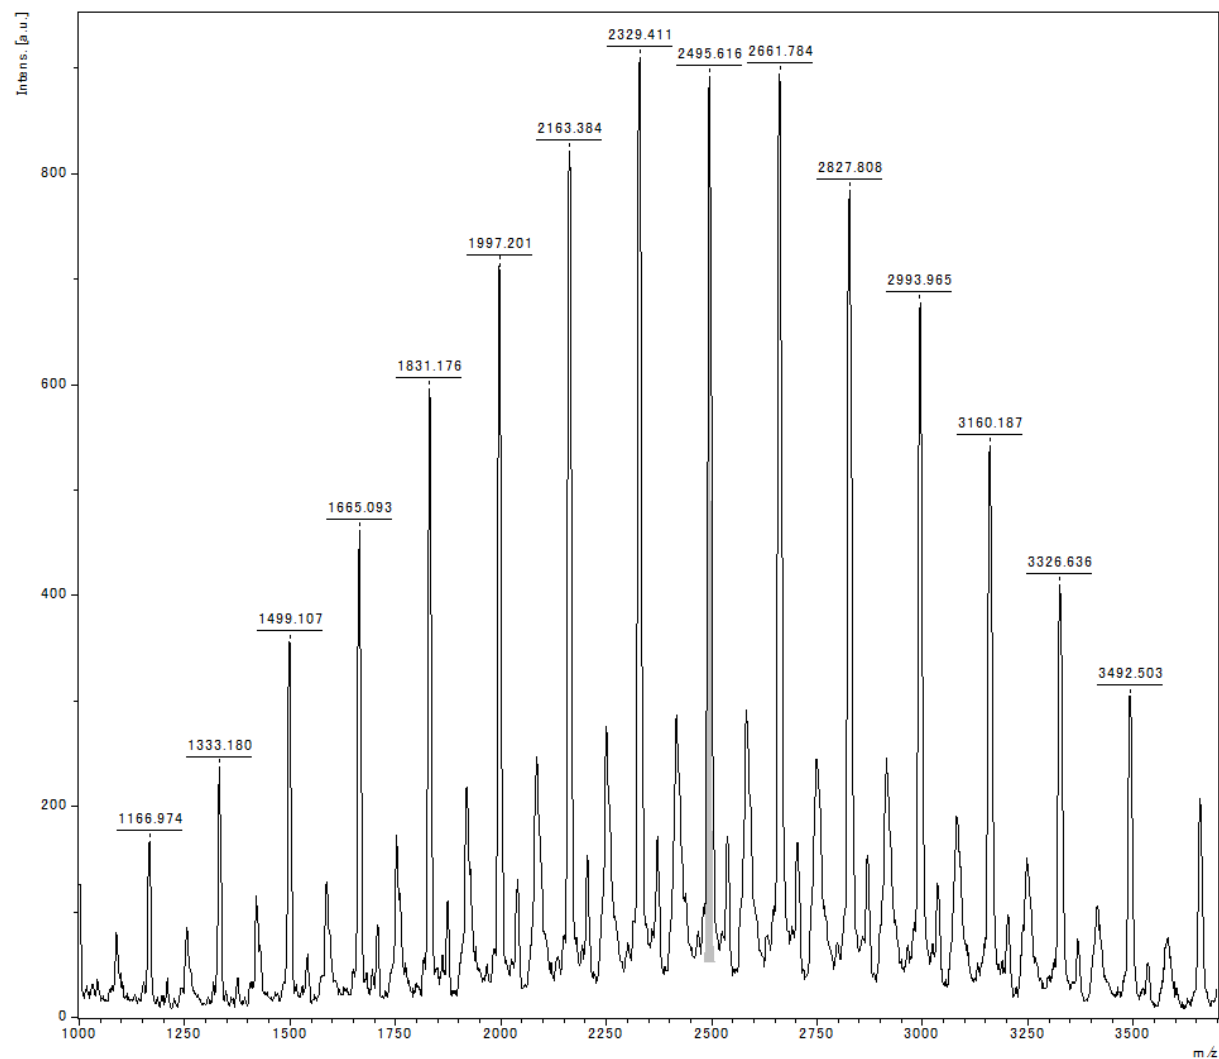

**Fig. S12** MALDI-TOF mass spectrum of  $\alpha$ 2-tol / $\omega$ SeH P3HT.

Calculated mass:

$\alpha$ -end (2-tolyl) + poly(3-thiophene-2,5-diyl) +  $\omega$ -end (2-selenol-3-hexylthiophene-5-yl)

$= 91.13 + 166.28 (n - 1) + 247.01 = 171.10 \text{ (tolyl-selenol)} + 166.28 n$

(for example, calculated mass: (2166.5, 2332.7, 2499.0).

9.  $^1\text{H}$  NMR spectra of  $\alpha\text{Br}/\omega\text{CS}_2\text{Ni}(\text{dppp})\text{Br}$  P3HT and  $\alpha2\text{-tol}/\omega\text{CS}_2\text{Ni}(\text{dppp})\text{Br}$  P3HT

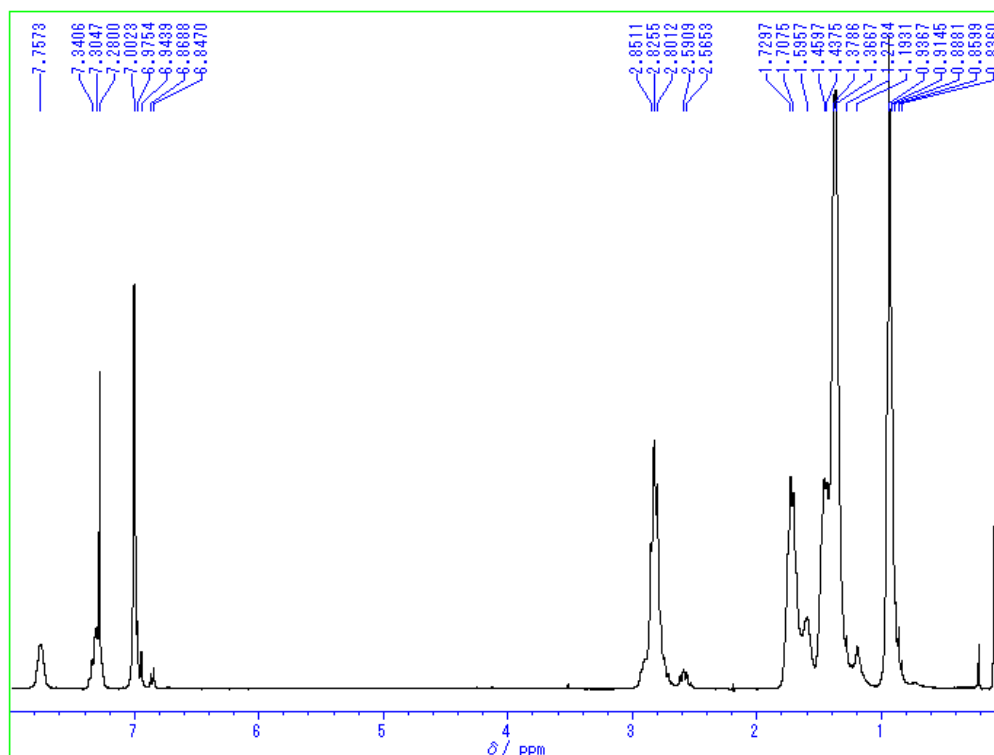

**Fig. S13**  $^1\text{H}$  NMR spectrum (300 MHz,  $\text{CDCl}_3$ , room temperature) of  $\alpha\text{Br}/\omega\text{CS}_2\text{Ni}(\text{dppp})\text{Br}$  P3HT.

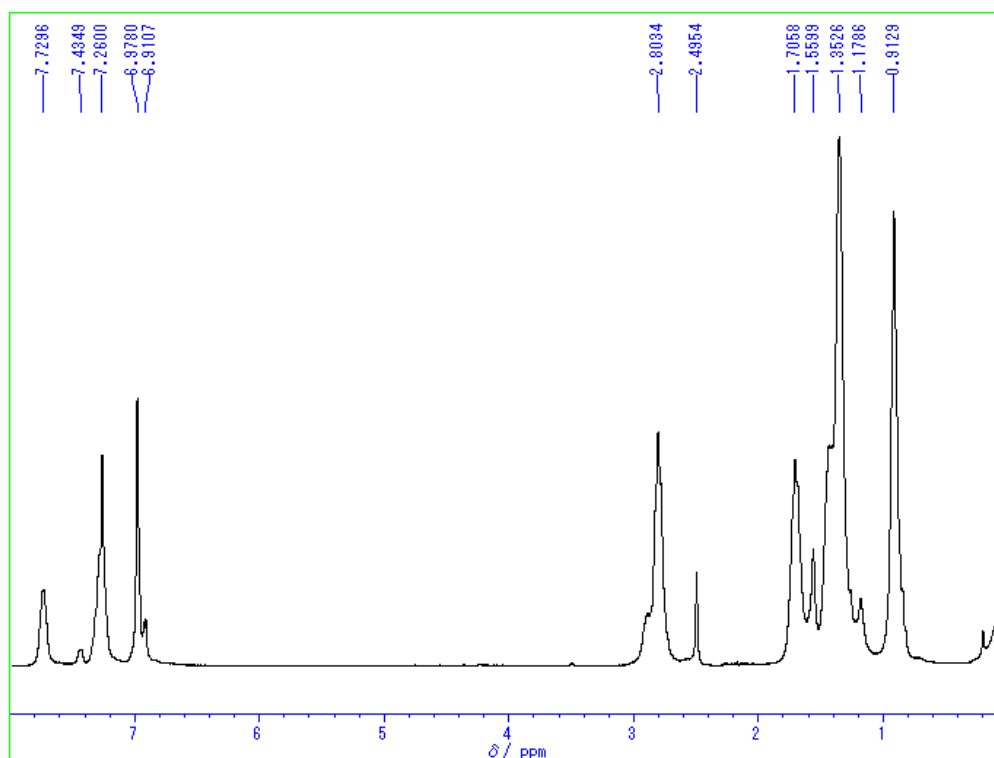

**Fig. S14**  $^1\text{H}$  NMR spectrum (300 MHz,  $\text{CDCl}_3$ , room temperature) of  $\alpha2\text{-tol}/\omega\text{CS}_2\text{Ni}(\text{dppp})\text{Br}$  P3HT.

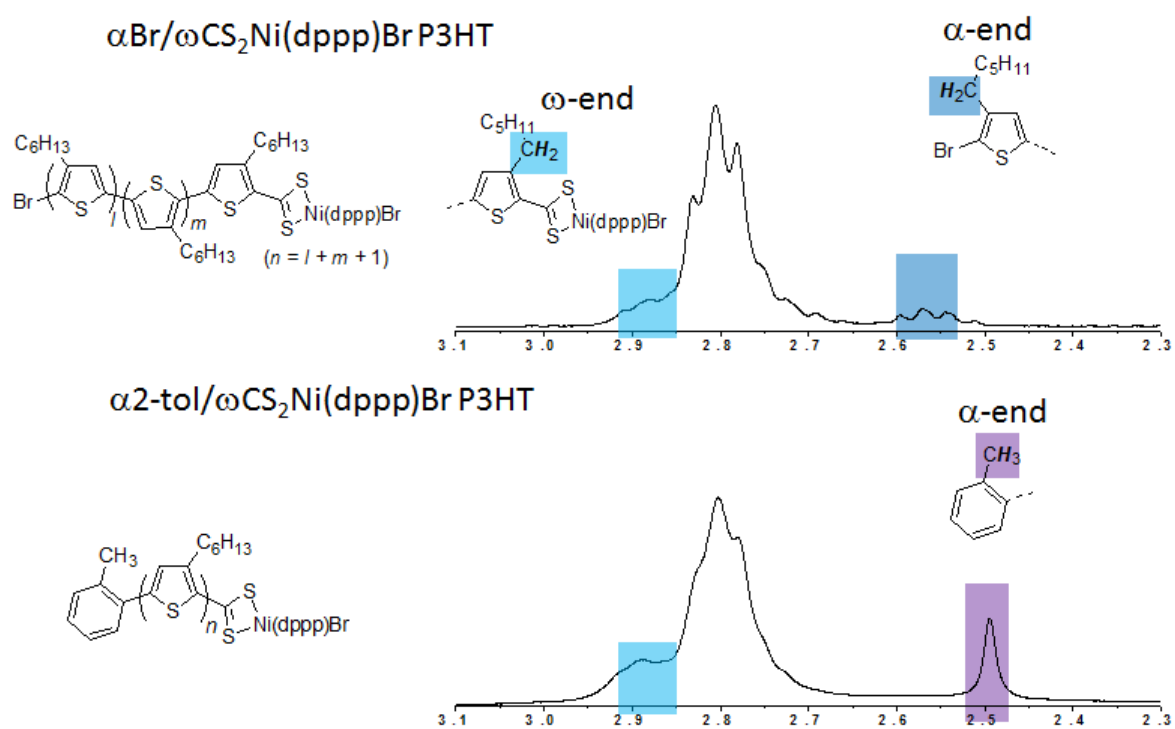

**Fig. S15** Expanded  $\alpha$ -CH<sub>2</sub> region for Fig. S13 and 14.

**10.**  $^{31}\text{P}\{^1\text{H}\}$  NMR spectra of  $\alpha\text{Br}/\omega\text{CS}_2\text{Ni}(\text{dppp})\text{Br}$  P3HT and  $\alpha2\text{-tol}/\omega\text{CS}_2\text{Ni}(\text{dppp})\text{Br}$  P3HT

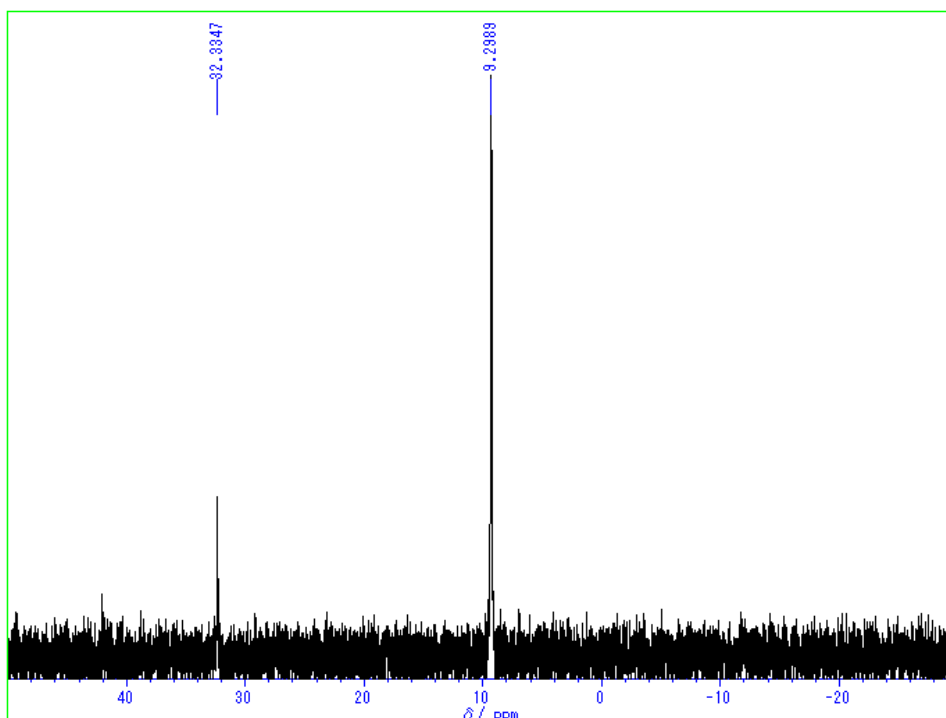

**Fig. S16**  $^{31}\text{P}\{^1\text{H}\}$  NMR spectrum (202 MHz,  $\text{CDCl}_3$ , room temperature) of  $\alpha\text{Br}/\omega\text{CS}_2\text{Ni}(\text{dppp})\text{Br}$  P3HT ( $\delta$  32.3 is unknown peak).

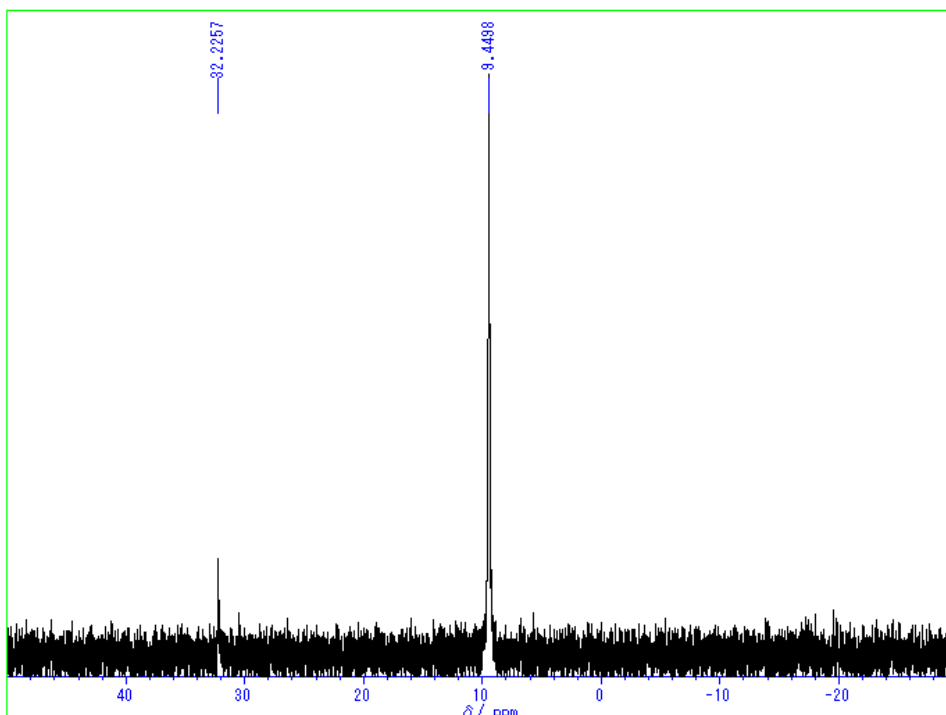

**Fig. S17**  $^{31}\text{P}\{^1\text{H}\}$  NMR spectrum (202 MHz,  $\text{CDCl}_3$ , room temperature) of  $\alpha2\text{-tol}/\omega\text{CS}_2\text{Ni}(\text{dppp})\text{Br}$  P3HT ( $\delta$  32.2 is unknown peak).

# 11. MALDI-TOF mass spectra of $\alpha$ Br/ $\omega$ CS<sub>2</sub>Ni(dppp) P3HT and $\alpha$ 2-tol/ $\omega$ CS<sub>2</sub>Ni(dppp) P3HT

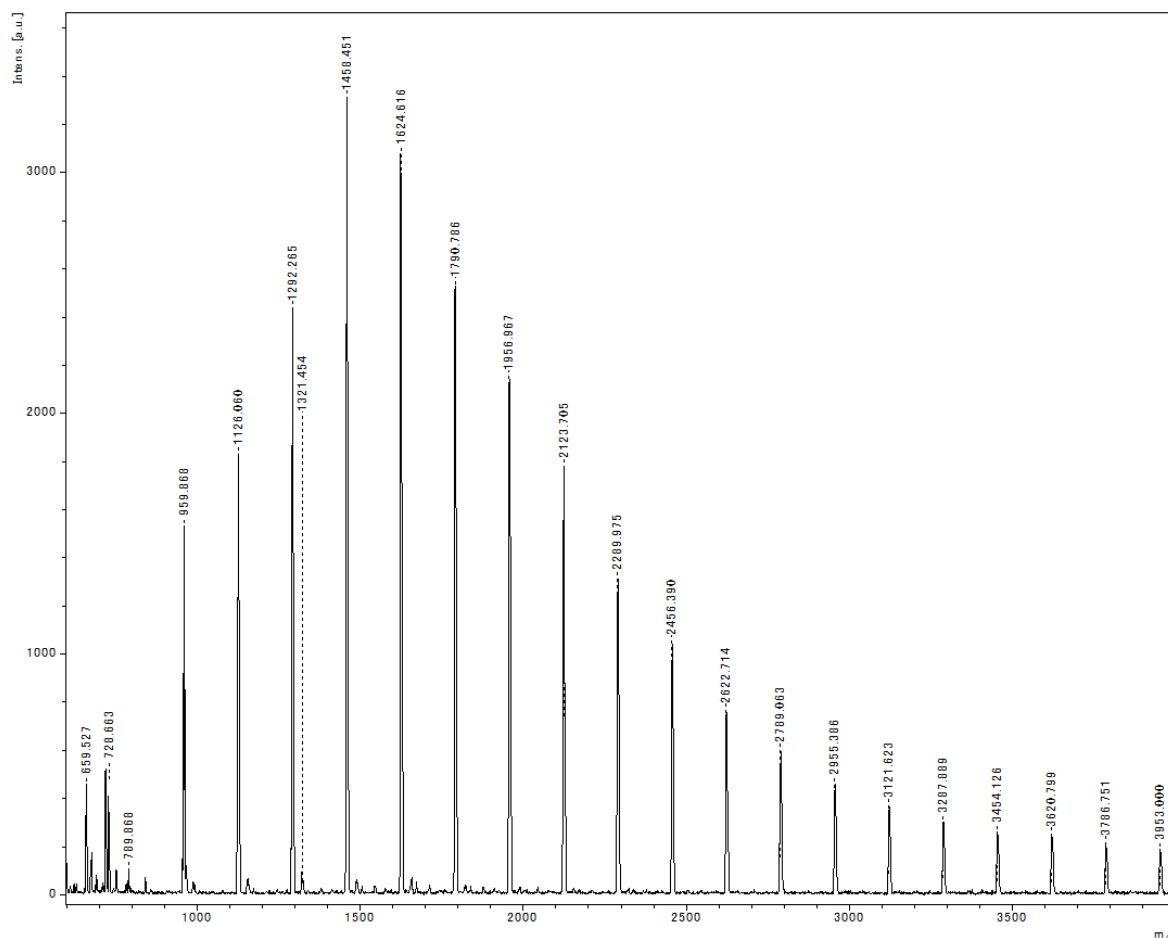

**Fig. S18** MALDI-TOF mass spectrum of  $\alpha$ Br/ $\omega$ CS<sub>2</sub>Ni(dppp)Br P3HT.

Calculated mass:

$\alpha$ -end (2-bromo-3-hexylthiophene-5-yl) + poly(3-thiophene-2,5-diyl) +  $\omega$ -end [1,3-Bis(diphenylphosphino)propane]

bromo(3-hexylthiophene-5-yl-2-carbothionato-*S,S'*)nickel(II) = 246.19 + 166.28 ( $l + m - 1$ ) + 713.56 = 627.18 (Br-Ni(dppp)CS<sub>2</sub>) + 166.28  $n$  (for example, calculated. Mass: 1458.6, 1624.9, 1791.1).

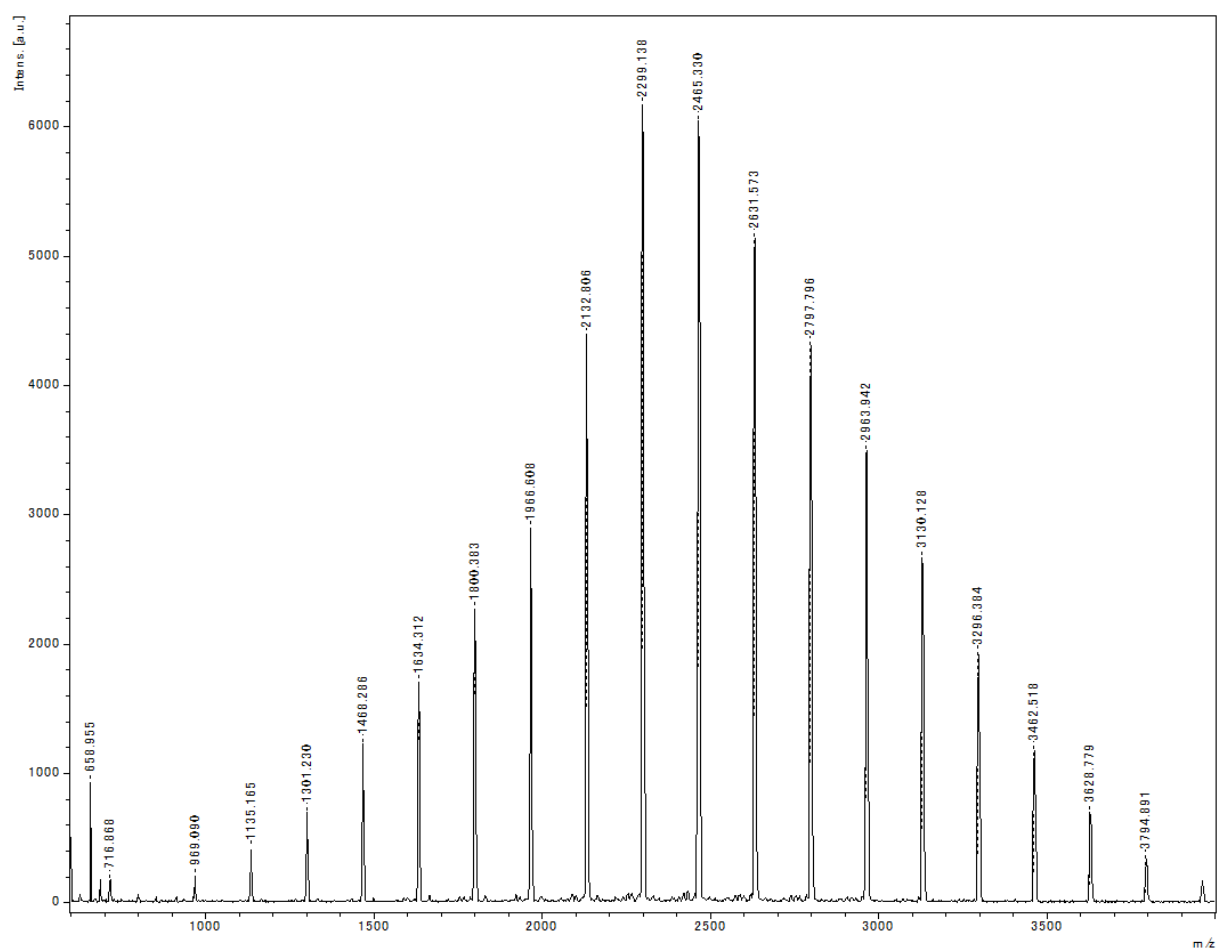

**Fig. S19** MALDI-TOF mass spectrum of  $\alpha_2$ -tol/ $\omega$ CS<sub>2</sub>Ni(dppp)Br P3HT.

Calculated mass:

$\alpha$ -end(2-tolyl) + poly(3-thiophene-2,5-diyl) + [1,3-Bis(diphenylphosphino)propane]  
bromo(3-hexylthiophene-5-yl-2-carbothionato-*S,S'*)nickel(II) = 91.13 + 166.28 (*n*-1) +  
713.56 = 638.41 (toluene-CS<sub>2</sub>Ni(dppp)) + 166.28 *n* (for example, calculated. Mass: (2134.9,  
2301.2, 2467.5)

## 12. Proposed SH end-capping mechanisms (Scheme S1 and S2)

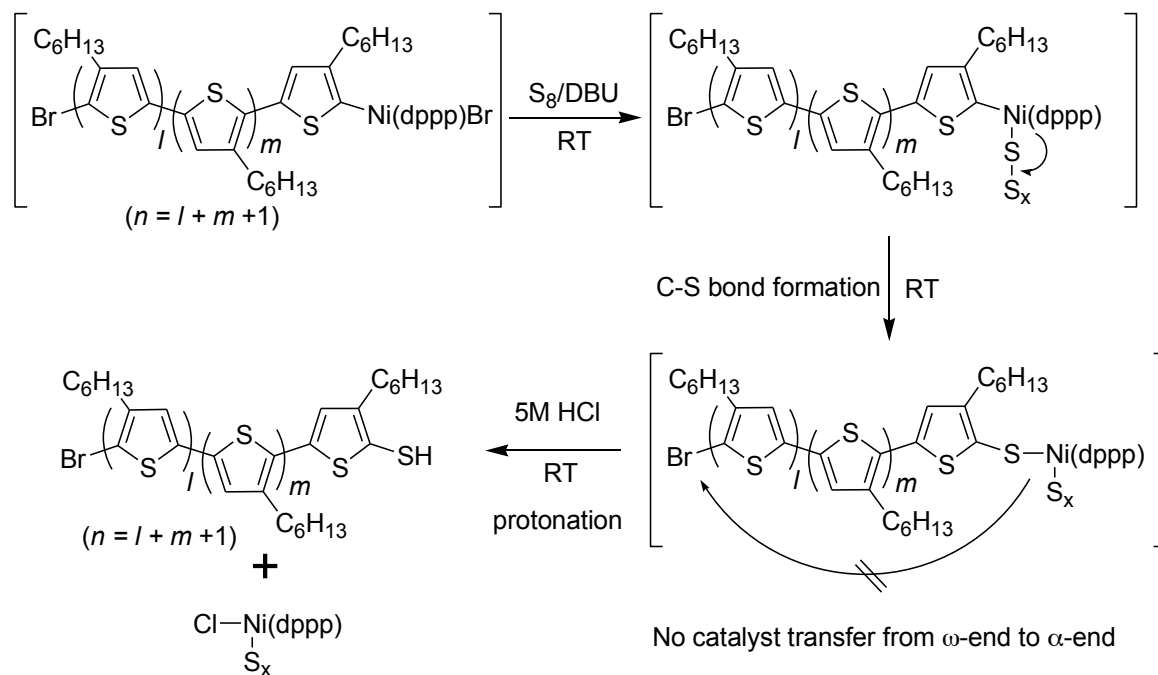

**Scheme S1.** Proposed mechanism of  $\omega$ -end capping by  $\text{S}_8/\text{DBU}$

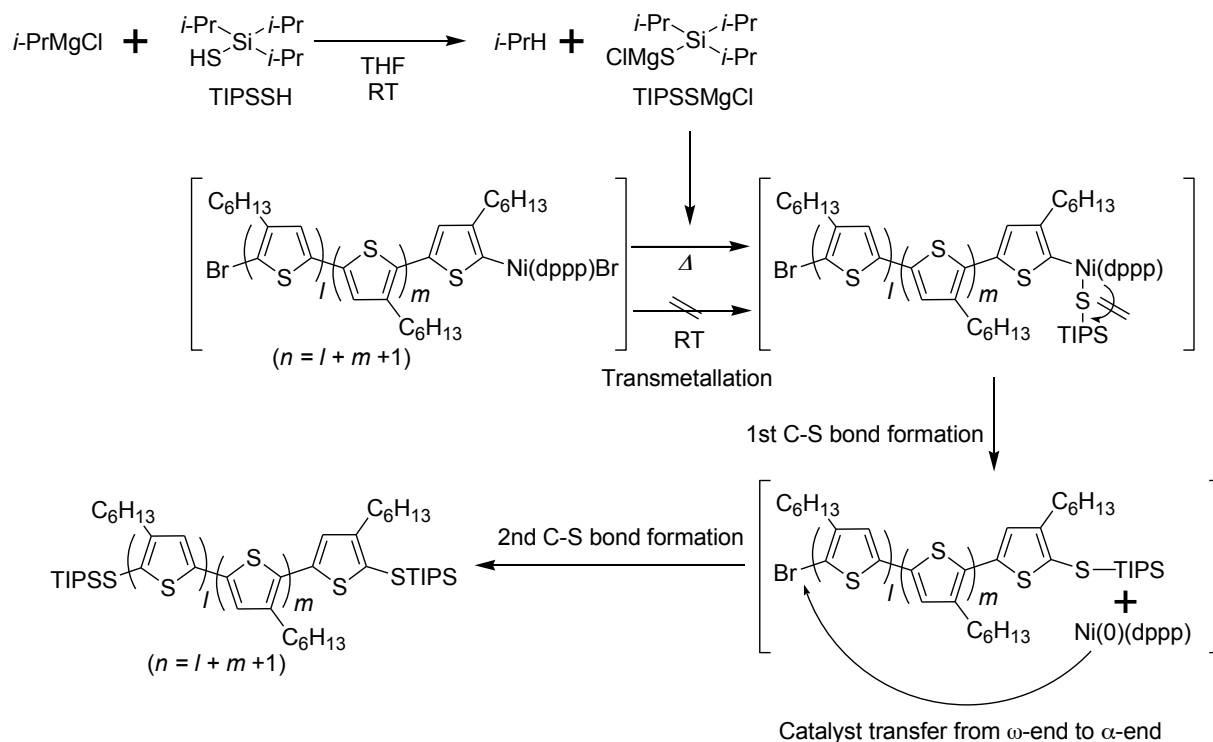

**Scheme S2.** Proposed mechanism of  $\alpha$ -end and  $\omega$ -end capping by  $\text{TIPS}/i\text{-PrMgCl}$

## Reference

1. End group analysis by NMR;  
<http://www.sigmaaldrich.com/technical-documents/articles/material-matters/polymer-analysis-by.html>
2. H. A. Bronstein and C. K. Luscombe, *J. Am. Chem. Soc.*, 2009, **131**, 12894.
